# Supplementary material for: Tuning of controller parameters using Pythagorean fuzzy similarity measure based on multicriteria decision making for stable and time delayed unstable plants
Source: PeerJ journal article supplement (doi:10.7717/peerj-cs.1504), 2023-08-10
Supplement: RawData.zip [file RawData.zip]

## Sheet: Sayfa1
	Objective Function	Kp	Ki	Kd	Kf	Cost	RiseTime	SettlingTime	Peak	Overshoot	Steady-state error
	Proposed - ABC	0.205124	0.00941124	0.385061	0.289589	0	3.05271	11.499	1.00035	0.0350569	0.00216168
	Proposed - ACOR	0.170255	0.0332972	0.445509	0.391609	0	3.03445	12.247	1.00012	0.0117924	5.0806e-05
	IAE - ABC	0.253132	0.00355085	0.489022	0.263645	3.86495	2.54201	12.153	1.00918	0.917853	0.000226646
	IAE - ACOR	0.244017	0.0116089	0.464914	0.292575	3.85965	2.46702	10.812	1.04549	4.54911	0.000122512
	ISE - ABC	0.329627	0.0001	0.588212	0.248791	2.93767	1.83403	18.051	1.14866	14.8665	0.00468596
	ISE - ACOR	0.307978	0.0134717	0.57955	0.292053	2.97598	1.88191	18.695	1.16247	16.2468	0.00146079
	ITAE - ABC	0.193324	0.0271911	0.478577	0.362266	10.7192	2.89067	13.277	1.00545	0.544667	2.99544e-06
	ITAE - ACOR	0.161996	0.0378237	0.445251	0.404666	10.5207	3.00944	11.709	1.01984	1.98387	1.10797e-05
	ITSE - ABC	0.278963	0.0001	0.485694	0.249871	4.83669	2.25843	12.186	1.06586	6.58594	0.00166185
	ITSE - ACOR	0.255183	0.0263572	0.542945	0.339561	5.08373	2.17169	13.576	1.10544	10.5442	0.000542928
