# Supplementary material for: Tuning of controller parameters using Pythagorean fuzzy similarity measure for stable and time delayed unstable plants
Source: PeerJ Comput Sci. 2023 Aug 10;9:e1504. doi: 10.7717/peerj-cs.1504 (PMC10495962; doi:10.7717/peerj-cs.1504)
Supplement: Supplemental Information 2 [file peerj-cs-09-1504-s002.docx]

|  | **1st Degree** | **2nd Degree** |
| --- | --- | --- |
|  |  |  |
|  |  |  |
|  |  |  |
|  |  |  |
|  |  |  |
|  |  |  |
|  |  |  |
|  |  |  |
|  |  |  |
|  | **3rd Degree** | **4th Degree** |
|  |  |  |
|  |  |  |
|  |  |  |
|  |  |  |
|  |  |  |
|  |  |  |
|  |  |  |
|  |  |  |
|  |  |  |
